# Supplementary material for: Population Pharmacokinetic Analysis of Perampanel in Portuguese Patients Diagnosed with Refractory Epilepsy
Source: MDPI journal article supplement (doi:10.3390/pharmaceutics15061704), 2023-06-10
Supplement: s1 [file s1]

# Supplementary Materials: Population Pharmacokinetic Analysis of Perampanel in Portuguese Patients Diagnosed with Refractory Epilepsy

Rui Silva, Helena Colom, Joana Bicker, Anabela Almeida, Ana Silva, Francisco Sales, Isabel Santana, Amílcar Falcão and Ana Fortuna

Table S1 – Demographic and pharmacotherapeutic characteristics of the patients included in the study.

| Patient | Sex    | Age (years) | BW (kg) | HT (cm) | BSA (m <sup>2</sup> ) | BMI (kg/m <sup>2</sup> ) | Daily dose of perampanel (mg) | Co-prescribed ASD  |
|---------|--------|-------------|---------|---------|-----------------------|--------------------------|-------------------------------|--------------------|
| 1       | Male   | 26          | 76      | 182     | 1.97                  | 22.94                    | 4                             | CLB, LEV, ZNS      |
| 2       | Male   | 54          | 70      | 167     | 1.79                  | 25.10                    | 4                             | CBZ                |
| 3       | Male   | 49          | 87      | 171     | 1.99                  | 29.75                    | 4                             | LEV                |
| 4       | Male   | 26          | 45      | 168     | 1.49                  | 15.94                    | 4                             | LEV                |
| 5       | Male   | 21          | 48      | 160     | 1.48                  | 18.75                    | 4                             | VA, CBZ, CLB, ZNS  |
| 6       | Male   | 20          | 78      | 176     | 1.94                  | 25.18                    | 6                             | ESL, LEV           |
| 7       | Female | 57          | 55      | 167     | 1.61                  | 19.72                    | 6                             | CBZ, LEV           |
| 8       | Male   | 20          | 72      | 180     | 1.91                  | 22.22                    | 4                             | VA, LEV            |
| 9       | Female | 23          | 83      | 166     | 1.91                  | 30.12                    | 6                             | CLB, LEV           |
| 10      | Male   | 39          | 98      | 175     | 2.13                  | 32.00                    | 4                             | VA, LEV            |
| 11      | Male   | 26          | 79      | 178     | 1.97                  | 24.93                    | 10                            | CLB, LAC, LEV      |
| 12      | Female | 21          | 57.5    | 160     | 1.59                  | 22.46                    | 8                             | CLB, LEV, OXC      |
| 13      | Male   | 47          | 79      | 179     | 1.98                  | 24.66                    | 2                             | VA, ESL, LAC, LEV  |
| 14      | Male   | 38          | 90      | 178     | 2.08                  | 28.41                    | 6                             | ESL, LEV           |
| 15      | Male   | 76          | 80      | 175     | 1.96                  | 26.12                    | 4                             | LEV                |
| 16      | Male   | 46          | 84      | 183     | 2.06                  | 25.08                    | 10                            | CBZ, LAC           |
| 17      | Male   | 53          | 99      | 185     | 2.23                  | 28.93                    | 10                            | CBZ, CLB, LEV      |
| 18      | Female | 21          | 65      | 168     | 1.74                  | 23.03                    | 8                             | VA                 |
| 19      | Male   | 52          | 59      | 169     | 1.68                  | 20.66                    | 8                             | ESL, LTG           |
| 20      | Female | 26          | 95      | 162     | 1.99                  | 36.20                    | 10                            | CBZ, CLB, LAC, LEV |
| 21      | Male   | 25          | 85      | 188     | 2.11                  | 24.05                    | 8                             | CBZ, LTG           |
| 22      | Male   | 27          | 84      | 181     | 2.05                  | 25.64                    | 8                             | ESL, PB, PHT, LEV  |
| 23      | Male   | 30          | 59      | 163     | 1.63                  | 22.21                    | 8                             | LEV                |
| 24      | Female | 41          | 77      | 162     | 1.82                  | 29.34                    | 6                             | VA, LEV, TPM       |

|    |        |    |      |     |      |       |    |                    |
|----|--------|----|------|-----|------|-------|----|--------------------|
| 25 | Female | 32 | 75   | 167 | 1.84 | 26.89 | 4  | TPM                |
| 26 | Male   | 55 | 97   | 169 | 2.07 | 33.96 | 8  | CBZ                |
| 27 | Female | 54 | 62   | 158 | 1.63 | 24.84 | 8  | CBZ, LAC, LEV      |
| 28 | Female | 43 | 69   | 158 | 1.71 | 27.64 | 6  | OXC, TPM           |
| 29 | Male   | 28 | 45   | 169 | 1.49 | 15.76 | 6  | LEV                |
| 30 | Female | 44 | 80   | 155 | 1.79 | 33.30 | 6  | CBZ, LEV, TPM      |
| 31 | Female | 23 | 55   | 176 | 1.68 | 17.76 | 6  | LEV, ZNS           |
| 32 | Female | 23 | 53   | 158 | 1.52 | 21.23 | 10 | CLB, LTG           |
| 33 | Male   | 44 | 90   | 170 | 2.01 | 31.14 | 4  | CBZ, ESL, LEV      |
| 34 | Male   | 31 | 60   | 160 | 1.62 | 23.44 | 6  | VA, LEV            |
| 35 | Female | 42 | 58   | 163 | 1.62 | 21.83 | 4  | CBZ, CLB, ZNS      |
| 36 | Male   | 56 | 94   | 169 | 2.04 | 32.91 | 8  | CBZ, ZNS           |
| 37 | Female | 25 | 93.5 | 164 | 1.99 | 34.76 | 6  | ESL, LEV           |
| 38 | Female | 34 | 65   | 164 | 1.71 | 24.17 | 4  | -                  |
| 39 | Male   | 53 | 61   | 163 | 1.66 | 22.96 | 8  | ESL, LTG           |
| 40 | Male   | 64 | 85   | 175 | 2.01 | 27.76 | 4  | CBZ, PB, LEV       |
| 41 | Male   | 19 | 95   | 194 | 2.27 | 25.24 | 10 | CLB, ESL, ZNS      |
| 42 | Female | 67 | 82   | 157 | 1.83 | 33.27 | 6  | VA, LEV, TPM       |
| 43 | Female | 23 | 63   | 155 | 1.62 | 26.22 | 4  | CBZ, CLB, PHT, LTG |
| 44 | Male   | 27 | 90   | 180 | 2.10 | 27.78 | 8  | ESL, PB, LEV       |

BW, Body weight; BMI, body mass index; BSA, body surface area; CBZ, carbamazepine; CLB, clobazam; ESL, eslicarbazepine acetate; HT, height; LAC, lacosamide; LEV, levetiracetam; LTG, lamotrigine; TPM, topiramate; OXC, oxcarbazepine; PB, phenobarbital; PHT, phenytoin; VA, valproic acid, ZNS, zonisamide.

Table S2 – Covariates tested for volume of distribution.

| Model | Covariates                                           | Parameters                                         | OBJ     | ΔOBJ                          |
|-------|------------------------------------------------------|----------------------------------------------------|---------|-------------------------------|
| Base  | TVCL=THETA(1)<br>TVV=THETA(2)                        | THETA(1)=0.672<br>THETA(2)=33.10                   | 765.384 | -                             |
| 1     | TVCL=THETA(1)<br>TVV=THETA(2)*(THETA(3)*BW)          | THETA(1)=0.666<br>THETA(2)=3.84<br>THETA(3)=0.107  | 753.456 | ΔOBJ <sub>1-0</sub> = -11.928 |
| 2     | TVCL=THETA(1)<br>TVV=THETA(2)*(THETA(3)*BSA)         | THETA(1)=0.669<br>THETA(2)=24.60<br>THETA(3)=0.687 | 760.205 | ΔOBJ <sub>2-0</sub> = -5.179  |
| 3     | TVCL=THETA(1)<br>TVV=THETA(2)*(THETA(3)*BMI)         | THETA(1)=.668<br>THETA(2)=6.61<br>THETA(3)=0.184   | 754.178 | ΔOBJ <sub>3-0</sub> = -11.206 |
| 4     | TVCL=THETA(1)<br>TVV=THETA(2)*((BW/77.5)**THETA(3))  | THETA(1)=0.663<br>THETA(2)=32.00<br>THETA(3)=1.55  | 750.765 | ΔOBJ <sub>4-0</sub> = -14.619 |
| 5     | TVCL=THETA(1)<br>TVV=THETA(2)*((BSA/1.9)**THETA(3))  | THETA(1)=0.666<br>THETA(2)=32.00<br>THETA(3)=1.99  | 758.045 | ΔOBJ <sub>5-0</sub> = -7.339  |
| 6     | TVCL=THETA(1)<br>TVV=THETA(2)*((BMI/25.1)**THETA(3)) | THETA(1)=0.665<br>THETA(2)=29.60<br>THETA(3)=2.07  | 747.792 | ΔOBJ <sub>6-0</sub> = -17.592 |
| 7     | TVCL=THETA(1)<br>TVV=THETA(2)*(THETA(3)**SEX)        | THETA(1)=0.672<br>THETA(2)=33.40<br>THETA(3)=0.971 | 765.363 | ΔOBJ <sub>7-0</sub> = -0.021  |
| 8     | TVCL=THETA(1)<br>TVV=THETA(2)*(THETA(3)*TP)          | THETA(1)=0.671<br>THETA(2)=12.80<br>THETA(3)=0.357 | 764.979 | ΔOBJ <sub>8-0</sub> = -0.405  |
| 9     | TVCL=THETA(1)<br>TVV=THETA(2)*((TP/7.0)**THETA(3))   | THETA(1)=0.671<br>THETA(2)=32.00<br>THETA(3)=0.942 | 764.977 | ΔOBJ <sub>9-0</sub> = -0.407  |
| 10    | TVCL=THETA(1)<br>TVV=THETA(2)*(THETA(3)*ALB)         | THETA(1)=0.671<br>THETA(2)=16.20                   | 766.254 | ΔOBJ <sub>10-0</sub> = +0.87  |

|    |                                                     |                                                    |         |                                    |
|----|-----------------------------------------------------|----------------------------------------------------|---------|------------------------------------|
|    |                                                     | THETA(3)=0.451                                     |         |                                    |
| 11 | TVCL=THETA(1)<br>TVV=THETA(2)*((ALB/4.4)**THETA(3)) | THETA(1)=0.672<br>THETA(2)=33.10<br>THETA(3)=0.008 | 765.386 | $\Delta\text{OBJ}_{11-0} = +0.002$ |
| 12 | TVCL=THETA(1)<br>TVV=THETA(2)*((AGE/33)**THETA(3))  | THETA(1)=0.672<br>THETA(2)=33.10<br>THETA(3)=0.038 | 765.364 | $\Delta\text{OBJ}_{12-0} = -0.02$  |

ALB, serum albumin; BW, Body weight; BMI, body mass index; BSA, body surface area; OBJ, objective function value; TP, total proteins; TVCL, typical value of clearance; TVV, typical value of volume of distribution.

Table S3 – Covariates tested for clearance.

| Model    | Covariates                                            | Parameters                                         | OBJ     | ΔOBJ                          | IPV                |
|----------|-------------------------------------------------------|----------------------------------------------------|---------|-------------------------------|--------------------|
| Base (0) | TVCL=THETA(1)<br>TVV=THETA(2)                         | THETA(1)=0.672<br>THETA(2)=33.10                   | 765.384 | -                             | 58.57%             |
| 1        | TVCL=THETA(1)*(THETA(3)*BW)<br>TVV=THETA(2)           | THETA(1)=0.032<br>THETA(2)=33.30<br>THETA(2)=0.291 | 764.030 | ΔOBJ <sub>1-0</sub> = -1.354  | 57.71%<br>(-0.86%) |
| 2        | TVCL=THETA(1)*(THETA(3)*BSA)<br>TVV=THETA(2)          | THETA(1)=0.502<br>THETA(2)=33.20<br>THETA(2)=0.730 | 763.392 | ΔOBJ <sub>2-0</sub> = -1.992  | 57.27%<br>(-1.30%) |
| 3        | TVCL=THETA(1)*(THETA(3)*BMI)<br>TVV=THETA(2)          | THETA(1)=0.136<br>THETA(2)=33.30<br>THETA(2)=0.195 | 764.193 | ΔOBJ <sub>3-0</sub> = -1.191  | 57.79%<br>(-0.78%) |
| 4        | TVCL=THETA(1)*((BW/77.5)**THETA(3))<br>TVV=THETA(2)   | THETA(1)=0.699<br>THETA(2)=33.20<br>THETA(2)=0.611 | 763.079 | ΔOBJ <sub>4-0</sub> = -2.305  | 57.01%<br>(-1.56%) |
| 5        | TVCL=THETA(1)*((BSA/1.9)**THETA(3))<br>TVV=THETA(2)   | THETA(1)=0.698<br>THETA(2)=33.20<br>THETA(2)=1.070 | 763.383 | ΔOBJ <sub>5-0</sub> = -2.001  | 57.27%<br>(-1.30%) |
| 6        | TVCL=THETA(1)*((BMI/25.1)**THETA(3))<br>TVV=THETA(2)  | THETA(1)=0.668<br>THETA(2)=33.10<br>THETA(2)=0.623 | 763.486 | ΔOBJ <sub>6-0</sub> = -1.898  | 57.27%<br>(-1.30%) |
| 7        | TVCL=THETA(1)*(THETA(3)**SEX)<br>TVV=THETA(2)         | THETA(1)=0.684<br>THETA(2)=33.10<br>THETA(2)=0.954 | 765.318 | ΔOBJ <sub>7-0</sub> = -0.066  | 58.57%<br>(-0%)    |
| 8        | TVCL=THETA(1)*((LDH/197.5)**THETA(3))<br>TVV=THETA(2) | THETA(1)=0.673<br>THETA(2)=33.10<br>THETA(2)=0.183 | 765.278 | ΔOBJ <sub>8-0</sub> = -0.106  | 58.48%<br>(-0.09%) |
| 9        | TVCL=THETA(1)*((AST/17)**THETA(3))<br>TVV=THETA(2)    | THETA(1)=0.672<br>THETA(2)=33.10<br>THETA(2)=0.008 | 765.436 | ΔOBJ <sub>9-0</sub> = -0.052  | 58.65%<br>(+0.08%) |
| 10       | TVCL=THETA(1)*((ALT/20)**THETA(3))<br>TVV=THETA(2)    | THETA(1)=0.675<br>THETA(2)=33.10                   | 765.005 | ΔOBJ <sub>10-0</sub> = -0.379 | 51.31%<br>(-7.26%) |

|    |                                                         |                                                    |         |                                    |                    |
|----|---------------------------------------------------------|----------------------------------------------------|---------|------------------------------------|--------------------|
|    |                                                         | THETA(2)=0.103                                     |         |                                    |                    |
| 11 | TVCL=THETA(1)*((AP/71)**THETA(3))<br>TVV=THETA(2)       | THETA(1)=0.665<br>THETA(2)=33.00<br>THETA(2)=0.251 | 764.098 | $\Delta\text{OBJ}_{11-0} = -1.286$ | 57.71%<br>(-0.86%) |
| 12 | TVCL=THETA(1)*((GGT/36.5)**THETA(3))<br>TVV=THETA(2)    | THETA(1)=0.689<br>THETA(2)=33.10<br>THETA(2)=0.297 | 758.381 | $\Delta\text{OBJ}_{12-0} = -7.003$ | 54.04%<br>(-4.53%) |
| 13 | TVCL=THETA(1)*((TB/0.45)**THETA(3))<br>TVV=THETA(2)     | THETA(1)=0.672<br>THETA(2)=33.10<br>THETA(2)=0.008 | 765.565 | $\Delta\text{OBJ}_{13-0} = +0.181$ | 58.74%<br>(+0.17%) |
| 14 | TVCL=THETA(1)*((TP/7.0)**THETA(3))<br>TVV=THETA(2)      | THETA(1)=0.664<br>THETA(2)=33.10<br>THETA(2)=1.24  | 764.793 | $\Delta\text{OBJ}_{14-0} = -0.591$ | 52.22%<br>(-6.35%) |
| 15 | TVCL=THETA(1)*((ALB/4.4)**THETA(3))<br>TVV=THETA(2)     | THETA(1)=0.671<br>THETA(2)=33.10<br>THETA(2)=0.344 | 765.295 | $\Delta\text{OBJ}_{15-0} = -0.089$ | 58.48%<br>(-0.09%) |
| 16 | TVCL=THETA(1)<br>TVV=THETA(2)*((AGE/33)**THETA(3))      | THETA(1)=0.665<br>THETA(2)=33.10<br>THETA(3)=0.194 | 764.647 | $\Delta\text{OBJ}_{11-0} = -0.737$ | 58.05%<br>(-0.52%) |
| 17 | TVCL=THETA(1)<br>TVV=THETA(2)* ( THETA(3)*GFR)          | THETA(1)=0.066<br>THETA(2)=33.10<br>THETA(3)=0.095 | 765.843 | $\Delta\text{OBJ}_{17-0} = +0.459$ | 58.91%<br>(+0.34%) |
| 18 | TVCL=THETA(1)<br>TVV=THETA(2)* ( THETA(3)*(GFR/110.6))  | THETA(1)=0.690<br>THETA(2)=33.10<br>THETA(3)=1.000 | 765.843 | $\Delta\text{OBJ}_{18-0} = +0.459$ | 58.91%<br>(+0.34%) |
| 19 | TVCL=THETA(1)<br>TVV=THETA(2)*((GFR/110.6)**THETA(3))   | THETA(1)=0.681<br>THETA(2)=33.10<br>THETA(3)=0.437 | 764.675 | $\Delta\text{OBJ}_{19-0} = -0.709$ | 58.14%<br>(-0.43%) |
| 20 | TVCL=THETA(1)<br>TVV=THETA(2)* ( THETA(3)**(GFR/110.6)) | THETA(1)=0.408<br>THETA(2)=33.10<br>THETA(3)=1.66  | 764.730 | $\Delta\text{OBJ}_{20-0} = -0.654$ | 58.14%<br>(-0.43%) |

ALB, serum albumin; ALT, alanine aminotransferase; AP, alkaline phosphatase; AST, aspartate aminotransferase; BW, Body weight; BMI, body mass index; BSA, body surface area; GFR, glomerular filtration rate; GGT, gamma-glutamyl transferase; IPV, interpatient variability; LDH, lactate dehydrogenase; OBJ, objective function value; TB, total bilirubin; TP, total proteins; TVCL, typical value of clearance; TVV, typical value of volume of distribution.

Table S4 – Antiseizure drugs tested for clearance.

| Model    | Covariates                                    | Parameters                                         | OBJ     | ΔOBJ                          | IPV                 |
|----------|-----------------------------------------------|----------------------------------------------------|---------|-------------------------------|---------------------|
| Base (0) | TVCL=THETA(1)<br>TVV=THETA(2)                 | THETA(1)=0.672<br>THETA(2)=33.10                   | 765.384 | -                             | 58.57%              |
| 1        | TVCL=THETA(1)*(THETA(3)**CBZ)<br>TVV=THETA(2) | THETA(1)=0.961<br>THETA(2)=33.00<br>THETA(2)=0.498 | 758.814 | ΔOBJ <sub>1-0</sub> = -6.57   | 54.31%<br>(-4.26%)  |
| 2        | TVCL=THETA(1)*(THETA(3)**OXC)<br>TVV=THETA(2) | THETA(1)=0.656<br>THETA(2)=33.10<br>THETA(2)=1.24  | 764.790 | ΔOBJ <sub>2-0</sub> = -0.594  | 58.22%<br>(-0.35%)  |
| 3        | TVCL=THETA(1)*(THETA(3)**PB)<br>TVV=THETA(2)  | THETA(1)=0.666<br>THETA(2)=33.10<br>THETA(2)=1.04  | 765.351 | ΔOBJ <sub>3-0</sub> = -0.033  | 58.57%<br>(-0%)     |
| 4        | TVCL=THETA(1)*(THETA(3)**PHT)<br>TVV=THETA(2) | THETA(1)=0.641<br>THETA(2)=33.10<br>THETA(2)=1.99  | 761.397 | ΔOBJ <sub>4-0</sub> = -3.987  | 55.95%<br>(-2.62%)  |
| 5        | TVCL=THETA(1)*(THETA(3)**CLB)<br>TVV=THETA(2) | THETA(1)=0.494<br>THETA(2)=32.80<br>THETA(2)=2.47  | 732.405 | ΔOBJ <sub>5-0</sub> = -32.979 | 40.00%<br>(-18.57%) |
| 6        | TVCL=THETA(1)*(THETA(3)**ESL)<br>TVV=THETA(2) | THETA(1)=0.611<br>THETA(2)=33.00<br>THETA(2)=1.46  | 761.848 | ΔOBJ <sub>6-0</sub> = -3.536  | 56.30%<br>(-2.27%)  |
| 7        | TVCL=THETA(1)*(THETA(3)**LAC)<br>TVV=THETA(2) | THETA(1)=0.642<br>THETA(2)=33.30<br>THETA(2)=2.76  | 759.278 | ΔOBJ <sub>7-0</sub> = -6.106  | 54.59%<br>(-3.98%)  |
| 8        | TVCL=THETA(1)*(THETA(3)**LEV)<br>TVV=THETA(2) | THETA(1)=0.663<br>THETA(2)=33.10<br>THETA(2)=1.13  | 765.180 | ΔOBJ <sub>8-0</sub> = -0.204  | 58.48%<br>(-0.09%)  |
| 9        | TVCL=THETA(1)*(THETA(3)**LTG)<br>TVV=THETA(2) | THETA(1)=0.813<br>THETA(2)=33.10<br>THETA(2)=0.742 | 762.686 | ΔOBJ <sub>9-0</sub> = -2.698  | 56.83%<br>(-1.74%)  |
| 10       | TVCL=THETA(1)*(THETA(3)**TPM)<br>TVV=THETA(2) | THETA(1)=0.670<br>THETA(2)=33.10                   | 765.359 | ΔOBJ <sub>10-0</sub> = -0.025 | 58.57%<br>(-0%)     |

|    |                                               |                                                    |         |                                     |                     |
|----|-----------------------------------------------|----------------------------------------------------|---------|-------------------------------------|---------------------|
|    |                                               | THETA(2)=1.07                                      |         |                                     |                     |
| 11 | TVCL=THETA(1)*(THETA(3)**ZNS)<br>TVV=THETA(2) | THETA(1)=0.685<br>THETA(2)=33.10<br>THETA(2)=0.852 | 765.056 | $\Delta\text{OBJ}_{11-0} = -0.328$  | 58.31%<br>(-0.26%)  |
| 12 | TVCL=THETA(1)*(THETA(3)**VA)<br>TVV=THETA(2)  | THETA(1)=0.715<br>THETA(2)=33.10<br>THETA(2)=0.710 | 763.133 | $\Delta\text{OBJ}_{12-0} = -2.251$  | 57.09%<br>(-1.48%)  |
| 13 | TVCL=THETA(1)*(THETA(3)**IND)<br>TVV=THETA(2) | THETA(1)=0.427<br>THETA(2)=33.30<br>THETA(2)=2.71  | 711.125 | $\Delta\text{OBJ}_{13-0} = -54.259$ | 31.09%<br>(-27.48%) |

CBZ, carbamazepine; CLB, clobazam; ESL, eslicarbazepine acetate; IND, enzyme-inducing antiseizure drugs; IPV, between-patient variability; LAC, lacosamide; LEV, levetiracetam; LTG, lamotrigine; TPM, topiramate; OBJ, objective function value; OXC, oxcarbazepine; PB, phenobarbital; PHT, phenytoin; TVCL, typical value of clearance; TVV, typical value of volume of distribution; VA, valproic acid, ZNS, zonisamide.



Table S5 – Covariates tested for final model. At bold is the final model.

| Model    | Covariates                                                                                  | Parameters                                                                                     | OBJ            | ΔOBJ                               | IPV                               |
|----------|---------------------------------------------------------------------------------------------|------------------------------------------------------------------------------------------------|----------------|------------------------------------|-----------------------------------|
| Base (0) | TVCL=THETA(1)<br>TVV=THETA(2)                                                               | THETA(1)=0.672<br>THETA(2)=33.10                                                               | 765.384        | -                                  | 58.57%                            |
| 1        | TVCL=THETA(1)*(THETA(3)**IND)<br>TVV=THETA(2)                                               | THETA(1)=0.427<br>THETA(2)=33.30<br>THETA(3)=2.71                                              | 711.125        | ΔOBJ <sub>1-0</sub> = -54.259      | 31.09%<br>(-27.48%)               |
| 2        | TVCL=THETA(1)*(THETA(3)**IND)*(THETA(4)**CLB)<br>TVV=THETA(2)                               | THETA(1)=0.417<br>THETA(2)=33.20<br>THETA(3)=2.64<br>THETA(4)=1.15                             | 709.554        | ΔOBJ <sub>2-1</sub> = -1.571       | 30.56%<br>(-28.01%)               |
| 3        | <b>TVCL=THETA(1)*(THETA(3)**IND)</b><br><b>TVV=THETA(2)*((BMI/25.1)**THETA(4))</b>          | <b>THETA(1)=0.419</b><br><b>THETA(2)=29.50</b><br><b>THETA(3)=2.76</b><br><b>THETA(4)=2.12</b> | <b>691.160</b> | <b>ΔOBJ<sub>3-1</sub>= -19.965</b> | <b>30.82%</b><br><b>(-27.75%)</b> |
| 4        | TVCL=THETA(1)*(THETA(3)**IND)*((GGT/36.5)**THETA(5))<br>TVV=THETA(2)*((BMI/25.1)**THETA(4)) | THETA(1)=0.427<br>THETA(2)=29.50<br>THETA(3)=2.67<br>THETA(4)=2.13<br>THETA(5)=0.057           | 690.454        | ΔOBJ <sub>4-3</sub> = -0.706       | 30.58%<br>(-27.99%)               |
| 5        | TVCL=THETA(1)*(THETA(3)**IND) *(THETA(5)**LAC)<br>TVV=THETA(2)*((BMI/25.1)**THETA(4))       | THETA(1)=0.420<br>THETA(2)=29.50<br>THETA(3)=2.77<br>THETA(4)=2.11<br>THETA(5)=0.978           | 691.137        | ΔOBJ <sub>5-3</sub> = -0.023       | 30.82%<br>(-27.75%)               |

BMI, body mass index; CLB, clobazam; IND, enzyme-inducing antiseizure drugs; IPV, between-patient variability; GGT, gamma-glutamyl transferase; LAC, lacosamide; OBJ, objective function value; TVCL, typical value of clearance; TVV, typical value of volume of distribution.
